# Supplementary material for: Chemical diversity and antifouling activity of geniculate calcareous algae (Corallinales, Rhodophyta) from Brazil
Source: PeerJ. 2023 Aug 14;11:e15731. doi: 10.7717/peerj.15731 (PMC10434099; doi:10.7717/peerj.15731)
Supplement: Supplemental Information 1 [file peerj-11-15731-s001.xlsx]

## Sheet: JcP
JcP
Replica	dead mussels	percentage (%)
1	0	0
2	0	0
3	0	0
4	0	0
5	1	33.33
6	1	33.33
7	1	33.33
8	1	33.33
9	1	33.33
10	1	33.33
average	0.6	20
standard deviation	0.51
