# Supplementary material for: Chemical diversity and antifouling activity of geniculate calcareous algae (Corallinales, Rhodophyta) from Brazil
Source: PeerJ. 2023 Aug 14;11:e15731. doi: 10.7717/peerj.15731 (PMC10434099; doi:10.7717/peerj.15731)
Supplement: Supplemental Information 2 [file peerj-11-15731-s002.xlsx]

## Sheet: Pseudoalteromonas elyakovii
P. elyakovii
24h
Replicas	1	1	2	2	3	3	4	4	5	5	average (mm)	standard deviation
AbFNS	3295	4853	2151	2151	2991	2756	4127	3665	2.74	3314	3.20	0.85
AbP	2831	3268	3923	3768	3588	3044	4916	3365	3167	3833	3.57	0.59
AbPF	2396	2831	3.77	3.77	2635	2907	3676	3676	2667	4167	3.25	0.62
AbSCB	3413	2976	3154	3473	4.27	4407	3675	3.21	4333	3835	3.67	0.52
CsSI	4833	4703	4153	4692	4134	5634	4.14	4606	4835	4333	4.61	0.46
AbSCC	2573	3286	2849	2596	3.31	3734	3397	2546	4411	3823	3.25	0.62
JcPA	2541	2106	3616	4539	3897	3862	2747	3.21	3833	4667	3.50	0.84
JcP	3	3286	2215	2216	4156	4015	2789	3.52	3383	2795	3.14	0.67
AfPC	2714	2287	2595	2723	3734	3593	2303	2667	3676	3087	2.94	0.55
Antibiotic (positive control)	7662	6.83	6579	7196	6.5	7.5	5478	7438	7342	7969	7.04	0.72

## Sheet: Pseudomonas fluorescens
P. elyakovii
24h
Replicas	1	1	2	2	3	3	4	4	5	5	Average (mm)	standard deviation
AbFNS	4382	4379	4.43	4286	4546	4453	2663	3441	4793	4234	4.16	0.63
AbP	3247	3095	3573	3001	3452	3184	4.22	3052	3093	3234	3.31	0.36
AbPF	3947	4515	3143	3576	3317	3589	2796	3312	3381	3381	3.49	0.47
AbSCB	2.8	3105	3001	3573	1952	2089	2273	2672	3676	3824	2.90	0.66
CsSI	3663	4378	4001	4143	4498	4635	4572	4961	3824	5	3.57	0.74
AbSCC	4857	4904	3458	4593	4641	4473	3626	4.93	3764	4347	4.36	0.45
JcPA	3521	3805	2857	3287	2363	2226	2663	2792	2354	2352	2.82	0.55
JcP	2499	2381	2321	3.71	3642	4807	2513	3346	3068	3347	3.16	0.78
AfPC	2262	2.38	1947	2573	3644	4142	3068	2374	2929	2.93	2.82	0.67
Antibiotic (positive control)	9219	9408	8894	10948	9626	8694	9138	9636	10769	8337	9.46	0.84

## Sheet: Polaribacter irgensii
24h	P. irgensii
Replicas		1	1	2	2	3	3	4	4	5	5	Average (mm)	standard deviation
AbFNS		2878	2728	1.52	1.67	1.55	1.95	2.93	3903	2765	3876	2.58	0.89
AbP		2635	3241	2744	3151	3286	3287	3069	3069	1973	3559	3.00	0.45
AbPF		3031	3485	2409	3.15	2618	2351	3069	2652	2133	2767	2.77	0.42
AbSCB		3334	3637	2267	3155	2218	2351	2512	3347	2.45	3399	2.87	0.55
CsSI		3787	4.09	4711	4747	4153	3821	4626	4043	3925	3874	4.18	0.38
AbSCC		4912	3927	3989	5.31	4138	4427	3566	4281	4711	4855	4.41	0.533
JcPA		3334	3787	3162	2483	2352	3154	2513	3178	2767	4825	3.16	0.74
JcP		2954	2465	2976	3844	3007	2567	2976	2976	3.15	3447	3.04	0.39
AfPC		3926	4603	4279	5.6	3848	3996	4799	4544	3298	4298	4.32	0.63
Antibiotic (positive control)		5802	6.2	6663	6621	5365	5542	5612	6612	5895	6179	6.05	0.48

## Sheet: Shewanella putrefaciens 
S. putrefaciens
24h
Replicas	1	1	2	2	3	3	4	4	5	5	Average (mm)	standard deviation
AbFNS	4295	4882	3676	4122	4122	4122	3966	3701	4662	4853	4.24	0.43
AbP	5441	3531	4569	4413	4265	4351	3702	4.09	4151	3487	4.20	0.57
AbPF	2817	2054	1817	2934	3453	3725	4543	2151	2376	2151	2.80	0.87
AbSCB	2.04	2263	2041	3862	4.27	4.68	2991	3.11	2874	1816	2.99	0.99
CsSI	4122	4265	4934	4041	3461	4227	4.78	4088	4319	4319	4.26	0.40
AbSCC	40556	3251	4613	3665	3896	4243	4474	3434	4088	3613	3.93	0.44
JcPA	2301	3461	4134	4819	2361	2756	3226	2992	2177	1938	3.02	0.92
JcP	4208	4448	4.74	3896	4127	4.74	4979	3319	3233	3.49	4.12	0.62
AfPC	3873	3314	3087	4704	3203	4972	3319	4001	4359	3615	3.85	0.66
Antibiotic (positive control)	9577	9712	9134	9323	9567	9865	10062	10918	9832	10002	9.80	0.48

## Sheet: Vibrio aestuarianus 
V. aestuarianus
24h
Replicas	1	1	2	2	3	3	4	4	5	5	Average (mm)	standard deviation
AbFNS	3556	3.29	2626	3.09	3347	2405	3.12	2835	3726	2911	3.09	0.41
AbP	3161	3.42	2971	2279	2757	2.17	2.54	2.25	3588	2634	2.78	0.49
AbPF	2631	3.42	2394	1.94	2756	2051	2.54	2106	3181	2361	2.54	0.48
AbSCB	2632	3816	2395	2278	2169	2173	2.54	2106	2499	1958	2.46	0.52
CsSI	3293	3561	3278	3517	3639	2427	2.54	3816	2363	3043	3.15	0.53
AbSCC	2089	2498	2911	4108	4086	3783	2526	2953	2046	2278	2.93	0.80
JcPA	2895	3027	2633	1702	2536	2405	2.54	2395	2246	1822	2.42	0.42
JcP	3317	2499	2.76	2463	3633	2.42	3094	2.81	2047	1815	2.69	0.53
AfPC	2361	3861	1717	2611	3329	2874	2242	2811	1.15	1.32	2.43	0.86
Antibiotic (positive control)	6172	6211	6114	5862	6586	6911	6696	7688	6.59	6308	6.51	0.52
