# Supplementary material for: Chemical diversity and antifouling activity of geniculate calcareous algae (Corallinales, Rhodophyta) from Brazil
Source: PeerJ. 2023 Aug 14;11:e15731. doi: 10.7717/peerj.15731 (PMC10434099; doi:10.7717/peerj.15731)
Supplement: Supplemental Information 3 [file peerj-11-15731-s003.xlsx]

## Sheet: Null control
Null Control
Replica	Fixed byssus	percentage (%)
1	16	84.21
2	16	72.73
3	18	81.82
4	19	65.52
5	15	93.75
6	15	78.95
7	15	93.75
8	16	69.57
9	14	100.00
10	16	72.73
average	16	81.30
standard deviation	1.49

## Sheet: AbFNS
							AbFNS
							Replica	Fixed byssus	percentage (%)
							1	2	25
							2	3	15
							3	3	15
							4	2	28.57
							5	2	25
							6	1	14.29
							7	3	15
							8	2	50
							9	0	0
							10	1	20
							average	1.9	20.79
							standard deviation	0.99

## Sheet: AbP
AbP
Replica	Fixed byssus	percentage (%)
1	2	25
2	2	50
3	2	40
4	3	25
5	3	21.43
6	3	17.65
7	3	37.5
8	1	25
9	3	15
10	3	15
average	2.5	27.16
standard deviation	0.71

## Sheet: AbPF
AbPF
Replica	Fixed byssus	percentage (%)
1	5	31.25
2	4	40
3	6	25
4	5	20
5	5	41.67
6	4	44.44
7	3	50
8	1	16.67
9	2	40
10	2	11.76
average	3.7	32.08
standard deviation	1.64

## Sheet: AbSCB
AbSCB
Replica	Fixed byssus	percentage (%)
1	1	25
2	2	25
3	3	33.33
4	2	15.38
5	3	20
6	3	15
7	3	20
8	3	18.75
9	1	25
10	3	20
average	2.4	21.75
standard deviation	0.84

## Sheet: AbSCC
AbSCC
Replica	Fixed byssus	percentage (%)
1	5	45.45
2	4	50
3	7	58.33
4	8	61.54
5	4	50
6	4	44.44
7	6	60
8	7	50
9	3	37.5
10	4	80
average	5.2	57.18
standard deviation	1.69

## Sheet: CsSI
						CsSI
						Replica	Fixed byssus	percentage (%)
						1	0	0
						2	0	0
						3	0	0
						4	0	0
						5	0	0
						6	0	0
						7	0	0
						8	0	0
						9	0	0
						10	0	0
						average	0	0
						standard deviation	0

## Sheet: JcPA
JcPA
Replica	Fixed byssus	percentage (%)
1	3	21.43
2	6	20
3	9	18.75
4	9	20.93
5	5	15.63
6	7	17.95
7	4	26.67
8	3	17.65
9	7	17.95
10	5	20
average	5.8	19.69
standard deviation	2.20

## Sheet: JcP
JcP
Replica	Fixed byssus	percentage (%)
1	3	15
2	4	25
3	1	16.67
4	1	25
5	1	10
6	1	14.29
7	1	33.33
8	2	20
9	1	33.33
10	2	40
average	1.7	23.26
standard deviation	1.06

## Sheet: AfPC
AfPC
Replica	Fixed byssus	percentage (%)
1	2	20
2	3	30
3	3	37.5
4	3	33.33
5	4	44.44
6	4	50
7	4	36.36
8	4	33.33
9	2	25
10	3	25
average	3.2	33.50
standard deviation	0.79
